# Supplementary material for: The Challenging Differentiation of Psoriatic Arthritis from Other Arthropathies and Nonspecific Arthralgias in Patients with Psoriasis: Results of a Cross-Sectional Rheumatologic Assessment of a Large Dermatologic Cohort
Source: MDPI journal article supplement (doi:10.3390/jcm12186090), 2023-09-21
Supplement: s1 [file s1]

## Supplementary Material

**Table S1.** Comparison of characteristics of suspected PsA patients grouped according to the final rheumatologist's classification

|                                     | New PsA<br>diagnosis<br>(A, n= 40) | Other<br>diagnosis<br>(B, n= 145) | Unspecific<br>arthralgia<br>(C, n= 108) | A vs A+B         | A vs B           | A vs C           |
|-------------------------------------|------------------------------------|-----------------------------------|-----------------------------------------|------------------|------------------|------------------|
| <b>Demographics</b>                 |                                    |                                   |                                         |                  |                  |                  |
| Males, n (%)                        | 15 (37.5)                          | 53 (36.6)                         | 50 (46.3)                               | n.s.             | n.s.             | n.s.             |
| Age, mean (SD), yrs                 | 51.9 (11.6)                        | 58.1 (14.1)                       | 55.4 (13.6)                             | <b>0.029</b>     | <b>0.001</b>     | n.s.             |
| Age at PsO onset, mean (SD) yrs     | 34.8 (19.0)                        | 38.1 (18.7)                       | 35.2 (17.9)                             | n.s.             | n.s.             | n.s.             |
| PsO duration, mean SD) yrs          | 17.1 (13.6)                        | 20.2 (15.5)                       | 20.3 (15.5)                             | n.s.             | n.s.             | n.s.             |
| Familiarity for PsA, n (%)          | 10 (25.0)                          | 21 (14.5)                         | 15 (13.9)                               | n.s.             | n.s.             | n.s.             |
| Manual workers, n (%)               | 21 (56.7)                          | 78 (53.8)                         | 53 (49.1)                               | n.s.             | n.s.             | n.s.             |
| Smokers, n (%)                      | 23 (57.5)                          | 89 (61.4)                         | 36 (33.3)                               | n.s.             | n.s.             | n.s.             |
| BMI                                 | 26.1 (4.0)                         | 26.9 (4.9)                        | 26.3 (5.3)                              | n.s.             | n.s.             | n.s.             |
| <b>PsO skin pattern</b>             |                                    |                                   |                                         |                  |                  |                  |
| Plaque, n (%)                       | 35 (87.5)                          | 111 (76.6)                        | 85 (78.7)                               | n.s.             | n.s.             | n.s.             |
| Guttate, n (%)                      | 1 (2.5)                            | 14 (9.7)                          | 3 (2.8)                                 | n.s.             | n.s.             | n.s.             |
| Inverse, n (%)                      | 4 (10.0)                           | 16 (11.0)                         | 9 (8.3)                                 | n.s.             | n.s.             | n.s.             |
| Palmoplantar, n (%)                 | 4 (10.0)                           | 22 (15.2)                         | 17 (15.7)                               | n.s.             | n.s.             | n.s.             |
| Pustular, n (%)                     | 4 (10.0)                           | 4 (2.8)                           | 6 (5.6)                                 | n.s.             | n.s.             | n.s.             |
| Erythroderma, n (%)                 | 0                                  | 3 (2.1)                           | 3 (2.8)                                 | n.s.             | n.s.             | n.s.             |
| Nails PsO, n (%)                    | 19 (47.5)                          | 64 (44.1)                         | 63 (58.3)                               | n.s.             | n.s.             | n.s.             |
| BSA max, mean (SD)                  | 16.2 (14.2)                        | 18.6 (20.0)                       | 18.9 (21.7)                             |                  |                  |                  |
| <b>SpA-related Comorbidities</b>    |                                    |                                   |                                         |                  |                  |                  |
| Uveitis, n (%)                      | 2 (5.0%)                           | 5 (3.4)                           | 1 (0.9)                                 | n.s.             | n.s.             | n.s.             |
| IBD, n (%)                          | 0                                  | 2 (1.4)                           | 1 (0.9)                                 | n.s.             | n.s.             | n.s.             |
| <b>Ongoing treatment</b>            |                                    |                                   |                                         |                  |                  |                  |
| Topic, n (%)                        | 35 (87.5)                          | 117 (80.7)                        | 84 (77.8)                               | n.s.             | n.s.             | n.s.             |
| Phototherapy, n (%)                 | 0                                  | 2 (1.4)                           | 2 (1.9)                                 | n.s.             | n.s.             | n.s.             |
| System. glucocorticoids, n (%)      | 2 (5.0)                            | 1 (0.7)                           | 3 (2.8)                                 | n.s.             | n.s.             | n.s.             |
| csDMARD, n (%)                      | 7 (17.5)                           | 12 (8.3)                          | 13 (12.0)                               | n.s.             | n.s.             | n.s.             |
| PDA4 inhibitor, n (%)               | 1 (2.5)                            | 11 (7.6)                          | 4 (3.7)                                 | n.s.             | n.s.             | n.s.             |
| bDMARDs, n (%)                      | 6 (15.0)                           | 28 (19.3)                         | 23 (21)                                 | n.s.             | n.s.             | n.s.             |
| <b>Total EARP score</b>             | <b>6.2 (1.7)</b>                   | <b>4.9 (1.7)</b>                  | <b>4.4 (1.6)</b>                        | <b>&lt;0.001</b> | <b>&lt;0.001</b> | <b>&lt;0.001</b> |
| <b>Individual EARP items*</b>       |                                    |                                   |                                         |                  |                  |                  |
| Joints pain                         | 23 (100)                           | 84 (100)                          | 66 (95.7)                               | n.s.             | n.s.             | n.s.             |
| NSAIDs use twice last 3 months      | 8 (34.8)                           | 39 (4.4)                          | 20 (29.0)                               | n.s.             | n.s.             | n.s.             |
| Low back pain at night              | 11 (47.8)                          | 27 (32.1)                         | 16 (23.2)                               | 0.051            | 0.005            | 0.001            |
| Morning stiffness ≥1 hour           | 16 (69.6)                          | 32 (38.1)                         | 21 (30.4)                               | 0.001            | n.s.             | n.s.             |
| Wrist and fingers pain              | 18 (78.3)                          | 67 (79.8)                         | 51 (73.9)                               | n.s.             | n.s.             | n.s.             |
| Swollen joints                      | 18 (78.3)                          | 38 (45.2)                         | 20 (29.0)                               | <b>&lt;0.001</b> | <b>0.005</b>     | <b>&lt;0.001</b> |
| Swollen wrist / fingers ≥3 days     | 13 (56.5)                          | 13 (15.5)                         | 7 (10.1)                                | <b>&lt;0.001</b> | <b>&lt;0.001</b> | <b>&lt;0.001</b> |
| Elbow and hips pain                 | 9 (39.1)                           | 41 (48.8)                         | 37 (53.6)                               | n.s.             | n.s.             | n.s.             |
| Feet and ankles pain                | 15 (65.2)                          | 55 (66.5)                         | 40 (58.0)                               | n.s.             | n.s.             | n.s.             |
| Swollen Achilles tendon             | 5 (21.7)                           | 9 (10.7)                          | 8 (11.6)                                | n.s.             | n.s.             | n.s.             |
| <b>Treat. mod. after PsA diagn.</b> |                                    |                                   |                                         |                  |                  |                  |
| Introduction csDMARD                | 34 (85.9)                          | -                                 | -                                       | -                | -                | -                |
| Introduction bDMARD                 | 21 (55.2)                          | -                                 | -                                       | -                | -                | -                |
| Injection joint therapy             | 13 (32.5)                          | -                                 | -                                       | -                | -                | -                |
|                                     | 0                                  | -                                 | -                                       | -                | -                | -                |

PsO, skin and nail psoriasis. PsA, Psoriatic arthritis. IBD, inflammatory bowel disease. csDMARDs, conventional synthetic disease-modifying anti-rheumatic disease. bDMARDs biologic DMARDs.
